# Supplementary material for: Immunotherapy Enhancement by Targeting Extracellular Tumor pH in Triple-Negative Breast Cancer Mouse Model
Source: MDPI journal article supplement (doi:10.3390/cancers15204931), 2023-10-11
Supplement: s1 [file s1]

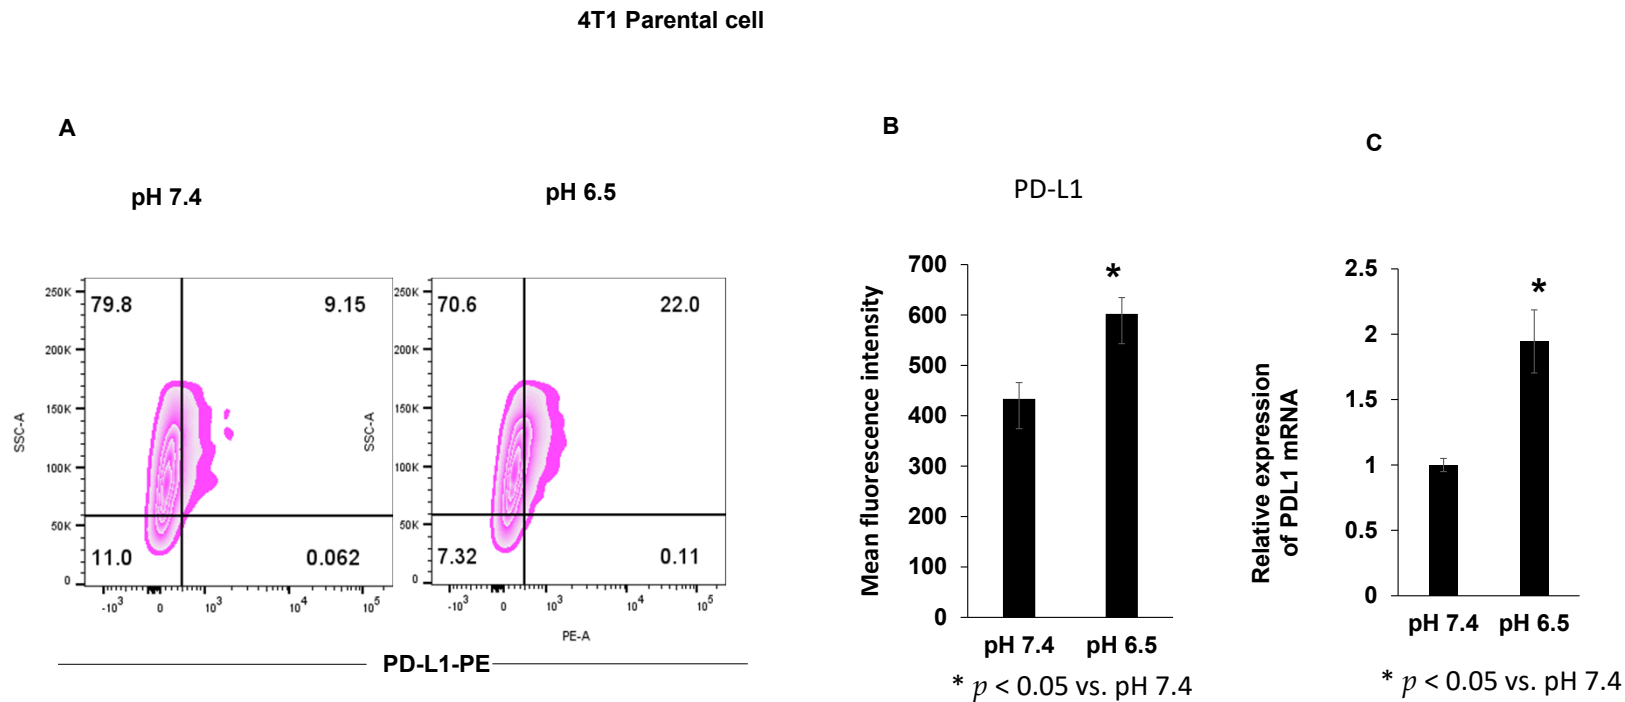

**Figure S1.** Effect of extracellular acidosis on PD-L1 expression in 4T1 parent cells. The pH of the cell culture medium was adjusted by HCl or NaOH, and 4T1 cells were incubated for 24 h and analyzed by flow cytometry. Flow cytometry dot plots (**A**) and mean fluorescence (**B**) of cell surface PD-L1 expression (\*  $p < 0.05$  for pH 6.5 vs. pH 7.4).
